# Supplementary material for: Bicultural Minds: A Cultural Priming Approach to the Self-Bias Effect
Source: MDPI journal article supplement (doi:10.3390/bs12020045), 2022-02-11
Supplement: s1 [file s1]

## Experiment 1: Implicit priming

### Neutral condition: RTs in mismatch trials

Data for the correct mismatch trials from the neutral condition were analysed using one within-subjects variable – shape-label association (self, friend, or stranger), *see Table 1*. A repeated measures ANOVA found no significant main effect of mismatched shape-label association,  $F(2, 62) = 1.11, p = .34, \eta^2 = .04$ .

*Table S1. Mean RTs (ms) and SDs (in brackets) for mismatched trials as a function of the shape-label association, priming and bias group in the Implicit experiment.*

| Association | Neutral  | Independent Priming |           | Interdependent Priming |           |
|-------------|----------|---------------------|-----------|------------------------|-----------|
|             |          | Low Bias            | High Bias | Low Bias               | High Bias |
| Self        | 754 (63) | 707 (68)            | 681 (67)  | 694 (57)               | 697 (57)  |
| Friend      | 754 (61) | 714 (56)            | 713 (55)  | 710 (47)               | 700 (41)  |
| Stranger    | 747 (58) | 706 (60)            | 692 (50)  | 697 (40)               | 692 (40)  |

### Priming conditions: RTs in mismatch trials

The data from the independent and interdependent priming conditions were analysed using two within-subjects variables – priming condition (independent or interdependent) and shape-based association (self, friend, or stranger) – and a between-subjects variable – bias group (low or high bias), *see Table 1 for mean RTs*. A repeated measures ANOVA revealed a significant main effect of mismatched shape-label association,  $F(2, 60) = 6.96, p < .05, \eta^2 = .19$ , but not priming,  $F(1, 30) = .54, p = .47, \eta^2 = .02$ . Responses for mismatched self association was significantly faster than friend association ( $p < .05$ ) but not stranger

association ( $p = 1.00$ ). Stranger association was also significantly faster than friend association ( $p < .01$ ). No interactions were found between priming and bias group,  $F(1, 30) = .70, p = .41$ , shape-label association and bias group,  $F(2, 60) = .23, p = .79$ , nor between priming and shape-label association,  $F(2, 60) = 1.98, p = .15$ . A significant three-way interaction between mismatched priming condition, shape-label association, and bias group was found,  $F(2, 60) = 7.49, p = .001, \eta^2 = .20$ , *see Table 1*.

The three-way interaction was decomposed by examining the self bias effect (calculated using mismatched friend RTs – self RTs) across the two priming conditions. A mixed design ANOVA revealed no significant main effect of priming,  $F(1, 30) = 3.24, p = .08$ . However, a significant interaction was found between priming (independent or interdependent) and bias group (low or high),  $F(1, 30) = 12.52, p = .001, \eta^2 = .29$ , *see Figure 1*.

Paired samples t-test revealed that participants in the high bias group showed significantly lower self bias relative to friend mismatch associations after interdependent priming than after independent priming,  $t(15) = 3.32, p < .01, dz = .91$ , *see Figure 1*. This difference was not found in participants in the low bias group,  $t(15) = -1.46, p = .17, dz = .26$ .

Independent samples t-test showed that the self bias relative to friend was significant smaller in the low bias group than the high bias group after independent priming,  $t(30) = -2.50, p < .05, dz = .89$ , *see Figure 1*, but not after interdependent priming,  $t(30) = 1.03, p = .31, dz = .36$ .

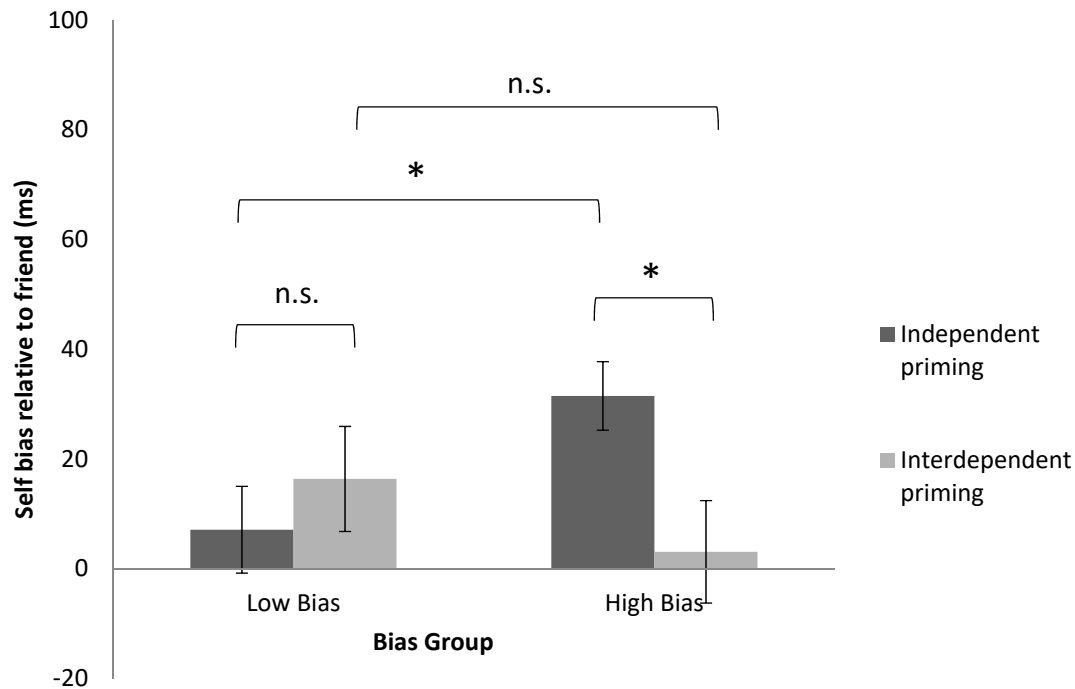

Figure S1. Decomposition of the significant interaction between priming, mismatched shape-label association and bias group using the self bias effect relative to friend (friend RT – self RT) in the mismatch trials. Mixed design ANOVA revealed a significant interaction between priming and bias group, and the paired samples *t*-test revealed a significant effect of priming in the high bias group. Error bars represent one standard errors. Significant results are marked with “\*”.

## Experiment 2: Explicit priming

### Neutral condition: RTs in mismatch trials

The RT data from the neutral condition on the shape-based mismatch associations were analysed using one within-subjects variable – shape-label association (friend, self, or stranger), see Table 2. A repeated measures ANOVA found no significant main effect of mismatched shape-label association,  $F(2, 62) = .85$   $p = .43$ . Response time differences were

minimal between the self and friend associations ( $p = 1.00$ ), and self and stranger associations ( $p = 1.00$ ). The RTs for the friend and stranger associations were also similar ( $p = .62$ ).

*Table S2. Mean RTs (SD in brackets) for mismatched trials as a function of the shape-label association, priming and bias group in the Explicit experiment.*

| Associations | Neutral  | Independent Priming |           | Interdependent Priming |           |
|--------------|----------|---------------------|-----------|------------------------|-----------|
|              |          | Low Bias            | High Bias | Low Bias               | High Bias |
| Self         | 699 (84) | 701 (81)            | 703 (63)  | 703 (89)               | 713 (58)  |
| Friend       | 701 (73) | 713 (65)            | 703 (65)  | 710 (80)               | 719 (56)  |
| Stranger     | 693 (72) | 704 (77)            | 690 (62)  | 691 (74)               | 703 (62)  |

### **Priming conditions: RTs in mismatch trials**

Data from the mismatch associations after independent and interdependent priming were analysed using two within-subjects variable – priming condition (independent or interdependent priming) and shape-based association (self, friend, or stranger) – and one between-subjects factor – bias group (low or high bias), *see Table 2*. A significant main effect of mismatched shape-label association was found,  $F(2, 60) = 6.02, p < .01, \eta^2 = .17$ . Responses for mismatched friend association was significantly slower than stranger association ( $p < .001$ ). The RTs for the self association was not significantly different from friend ( $p = .51$ ) or stranger associations ( $p = .26$ ). No main effect of priming was found,  $F(1, 30) = .14, p = .71$ . No interactions were found between priming and bias group,  $F(1, 30) = .69, p = .41$ , nor between shape-label association and bias group,  $F(2, 60) = .52, p = .60$ ,

nor between priming and shape-label association,  $F(2, 60) = .63, p = .54$ . No significant three-way interaction was found between priming, shape-label association and bias group,  $F(2, 60) = .86, p = .43$ .
